# Supplementary material for: M supported on Al-defective Al2−δO3(M = Fe, Co, Ni, Cu, Ag, Au) as catalysts for acetylene semi-hydrogenation: a theoretical perspective
Source: Royal Society of Chemistry journal article supplement (doi:10.1039/d3cp02095a), 2023-01-01
Supplement: d3cp02095a1.pdf [file d3cp02095a1.pdf]

### *Supporting information*

M Supported on Al-Defective  $\text{Al}_{2-\delta}\text{O}_3$  (M=Fe, Co, Ni, Cu, Ag, Au) as Catalyst for acetylene semi-hydrogenation: A Theoretical Perspective.

Bing-Bing Li<sup>a</sup>, Hong-Yan Ma<sup>a\*</sup>, Gui-Chang Wang<sup>b\*</sup>

(<sup>a</sup> Tianjin RenAi College, Tianjin 301636, China; <sup>b</sup> Frontiers Science Center for New Organic Matter and Tianjin Key Lab and Molecule-based Material Chemistry, College of Chemistry, Nankai University, Tianjin 300071, China)

\* Corresponding author.

E-mail address: [mahongyan@mail.nankai.edu.cn](mailto:mahongyan@mail.nankai.edu.cn) (H.Y. Ma);

[wangguichang@nankai.edu.cn](mailto:wangguichang@nankai.edu.cn) (G.C. Wang)

### Part S1. Calculation details of $E_{\text{(formation)}}$

The formation energy ( $E_f$ ) of  $M_1/Al_{2-\delta}O_3$  is defined as:

$$E_f = E(M_1/Al_{2-\delta}O_3) - E(Al_2O_3) + E_{\text{(bulk-Al)}} - E_{\text{(bulk-M)}}$$

where  $E(M_1/Al_{2-\delta}O_3)$  and  $E(Al_2O_3)$  stand for the energy of the  $M_1/Al_{2-\delta}O_3$  and  $Al_2O_3$ .

$E_{\text{(bulk-Al)}}$  and  $E_{\text{(bulk-M)}}$  are from the energies of bulk Al and the M in the bulk phase.

For the  $M_1(OH)_n/Al_{2-\delta}O_{3-\theta}$ ,  $E_f$  is defined as:

$$E_f = E(M_1(OH)_n/Al_{2-\delta}O_{3-\theta}) - E(Al_2O_3) + E_{\text{(bulk-Al)}} - n/2 \times E(H_2) - E_{\text{(bulk-M)}}$$

where  $E(M_1/Al_{2-\delta}O_3)$  and  $E(H_2)$  stand for the energy of the  $M_1/Al_{2-\delta}O_3$  and the energy of  $H_2$  in gas phase.

### Part S2.

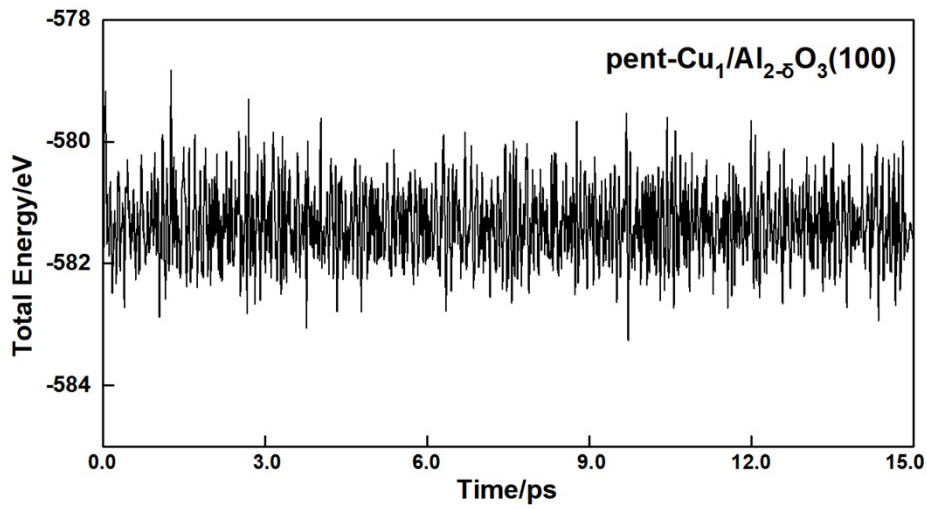

Figure S 1 The variety of total energy with the increase in ion steps at 800K.

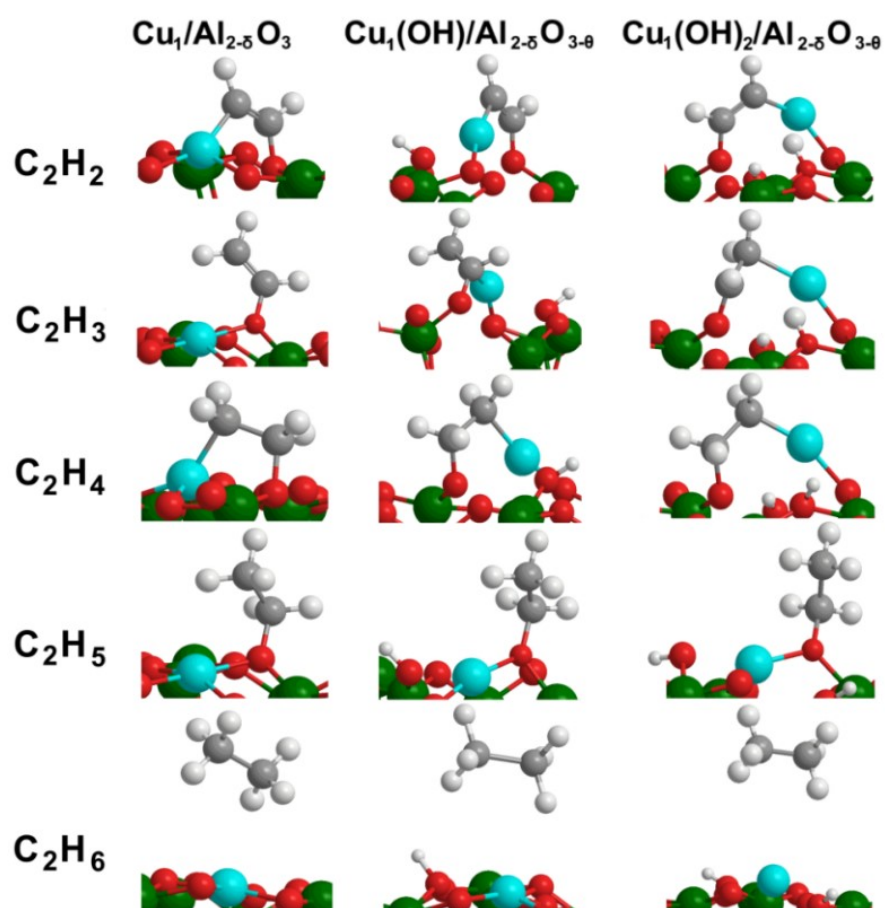

Figure S 2 The configurations of the intermediates on the  $\text{Cu}_1/\text{Al}_{2-\delta}\text{O}_3$ ,  $\text{Cu}_1(\text{OH})_1/\text{Al}_{2-\delta}\text{O}_{3-\theta}$ , and  $\text{Cu}_1(\text{OH})_2/\text{Al}_{2-\delta}\text{O}_{3-\theta}$ .

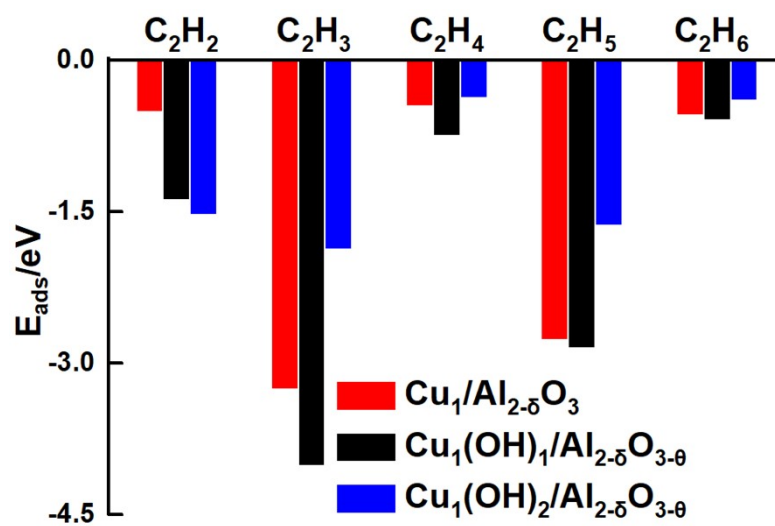

Figure S 3 The adsorption energies of the intermediates on the  $\text{Cu}_1/\text{Al}_{2.5}\text{O}_3$  and  $\text{Cu}_1(\text{OH})_n/\text{Al}_{2.5}\text{O}_{3-\theta}$  ( $n=1, 2$ ).

**Cu<sub>1</sub>/Al<sub>2-δ</sub>O<sub>3</sub>**

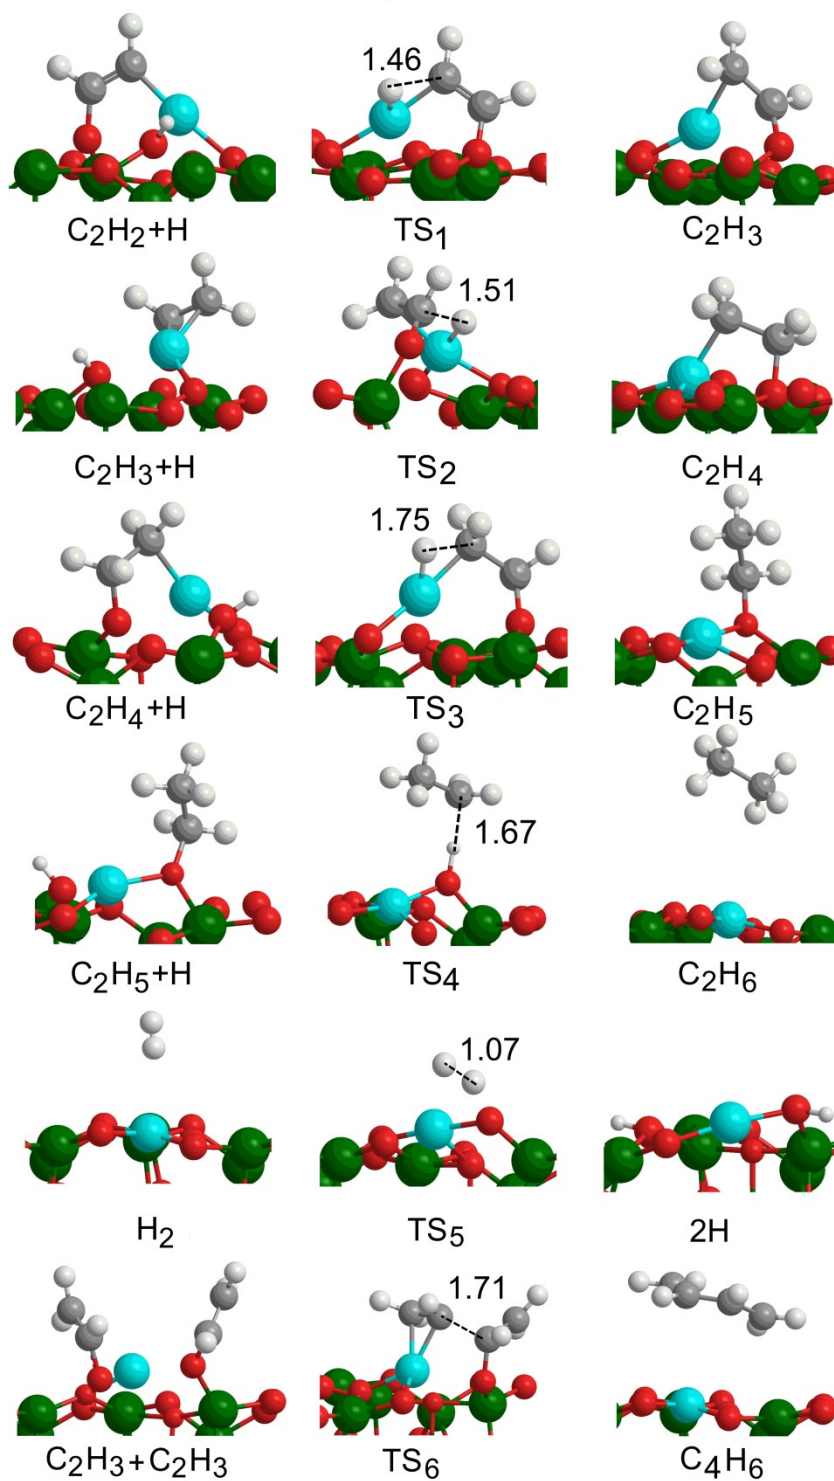

Figure S 4 The structures of possible TSs on the Cu<sub>1</sub>/Al<sub>2-δ</sub>O<sub>3</sub>.

$\text{Cu}_1(\text{OH})_1/\text{Al}_{2-6}\text{O}_{3-6}$

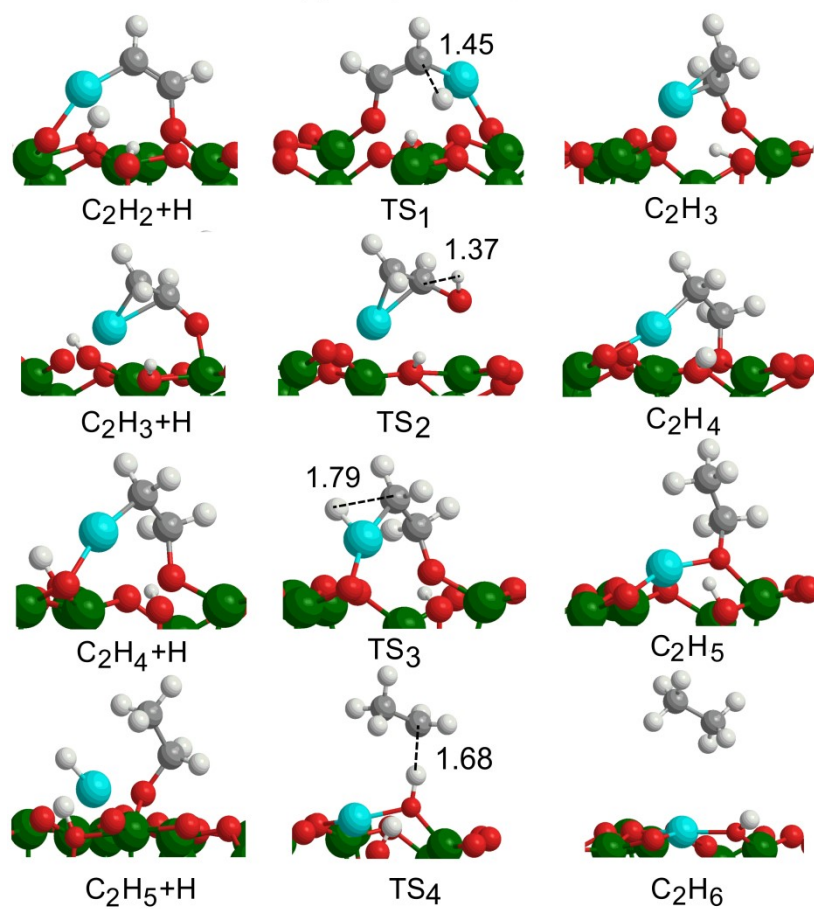

Figure S 5 The structures of possible TSs on the  $\text{Cu}_1(\text{OH})_1/\text{Al}_{2-6}\text{O}_3$ .

$\text{Cu}_1(\text{OH})_2/\text{Al}_{2-8}\text{O}_{3-6}$

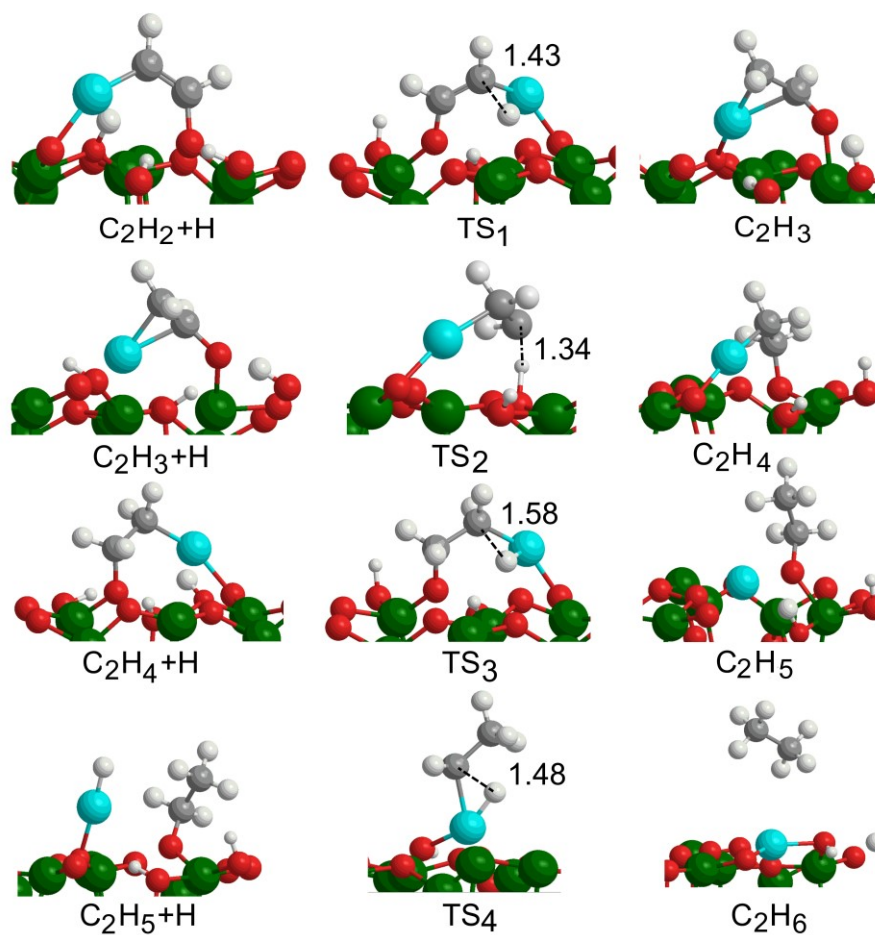

Figure S 6 The structures of possible TSs on the  $\text{Cu}_1(\text{OH})_2/\text{Al}_{2-8}\text{O}_3$ .

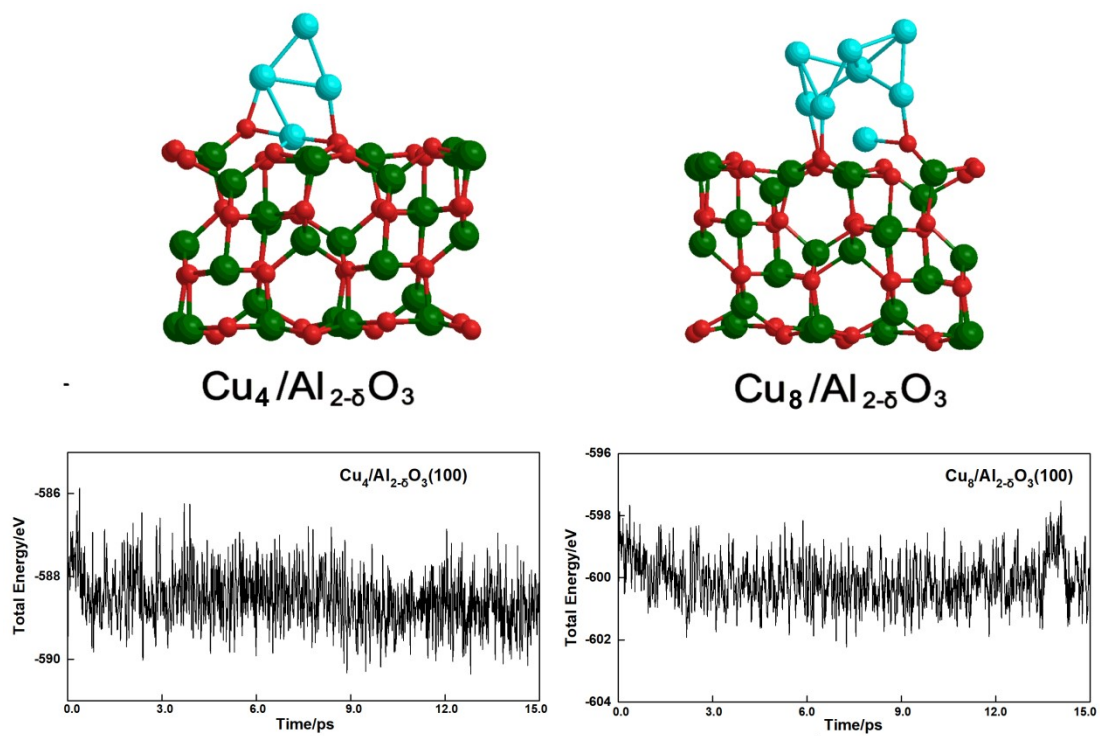

Figure S 7 The structures of  $\text{Cu}_4/\text{Al}_{2-\delta}\text{O}_3$  and  $\text{Cu}_8/\text{Al}_{2-\delta}\text{O}_3$  and the AIMD simulation at 800K.



# $\text{Cu}_4/\text{Al}_{2-\delta}\text{O}_3$

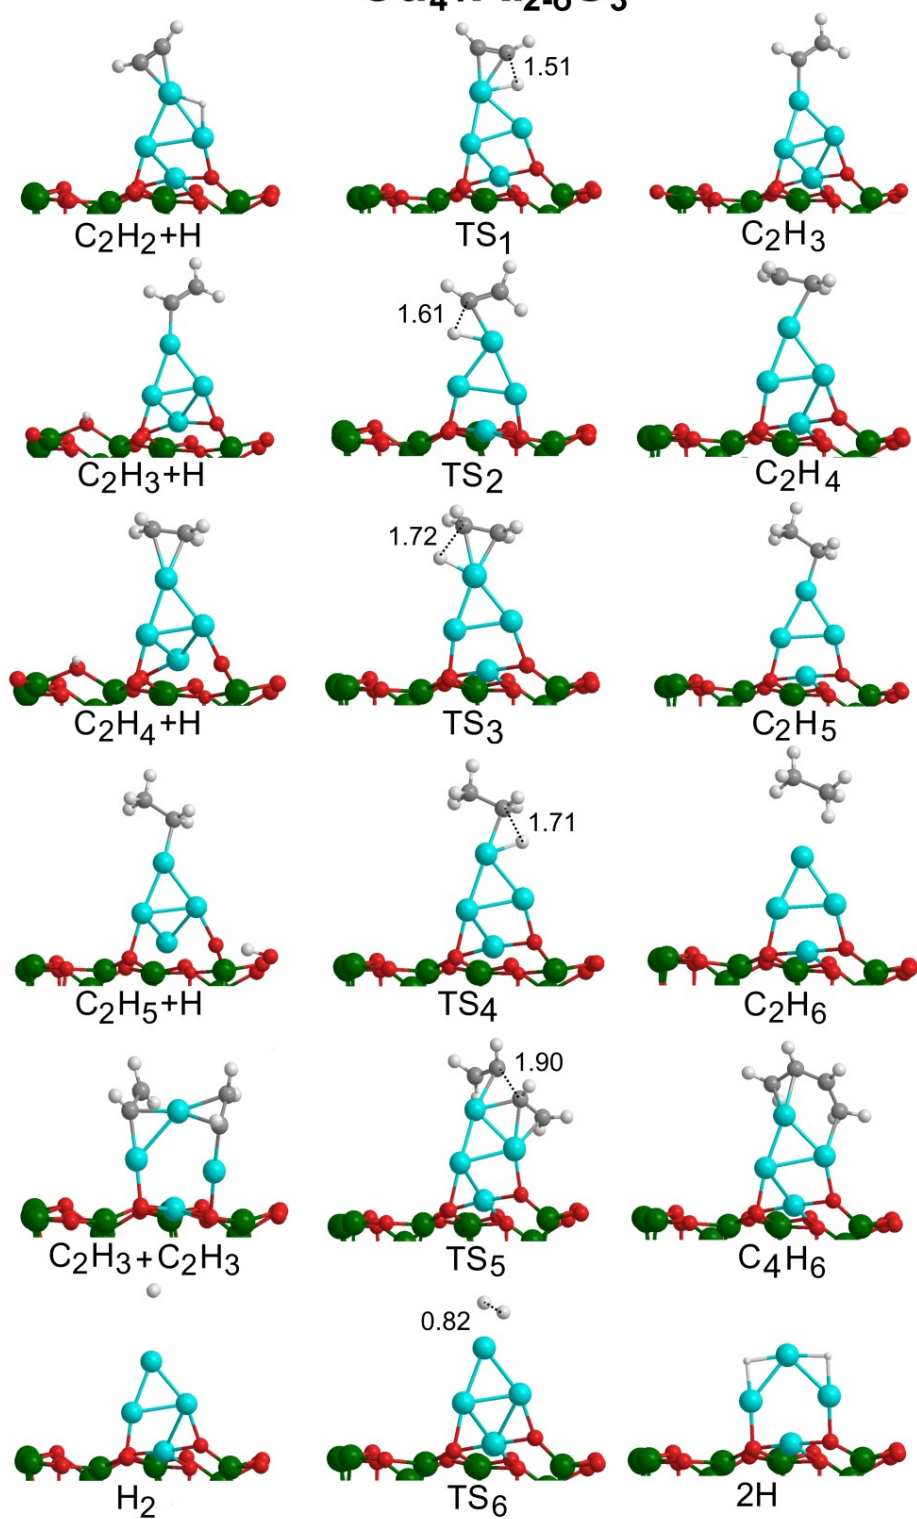

Figure S 8 The structures of possible TSs on the  $\text{Cu}_4/\text{Al}_{2-\delta}\text{O}_3$ .

# $\text{Cu}_8/\text{Al}_{2-\delta}\text{O}_3$

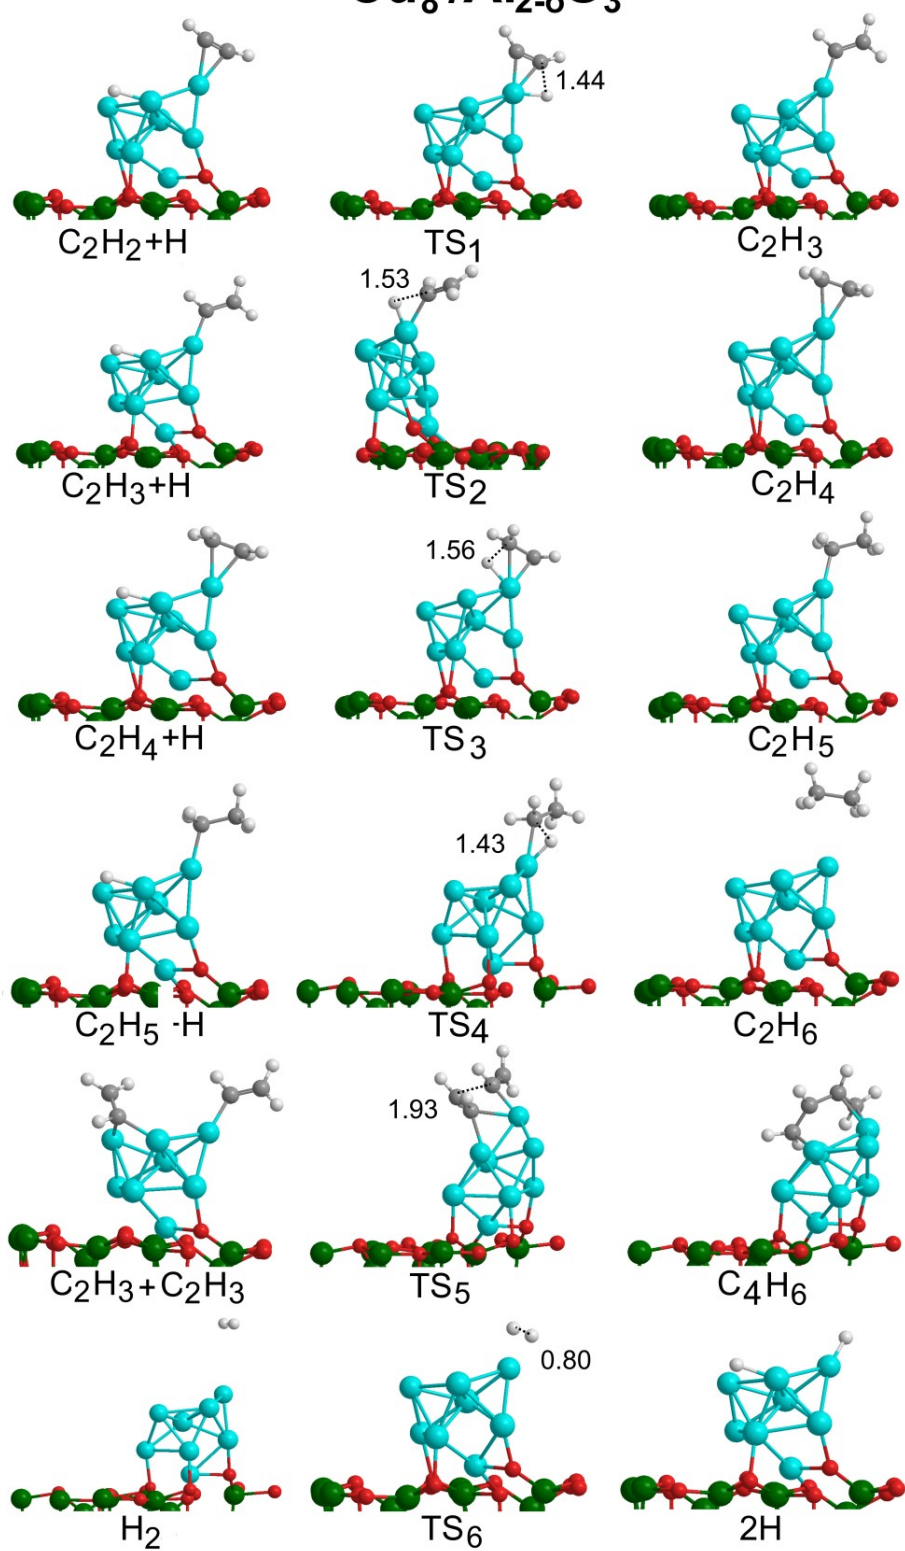

Figure S 9 The structures of possible TSs on the  $\text{Cu}_8/\text{Al}_{2-\delta}\text{O}_3$ .

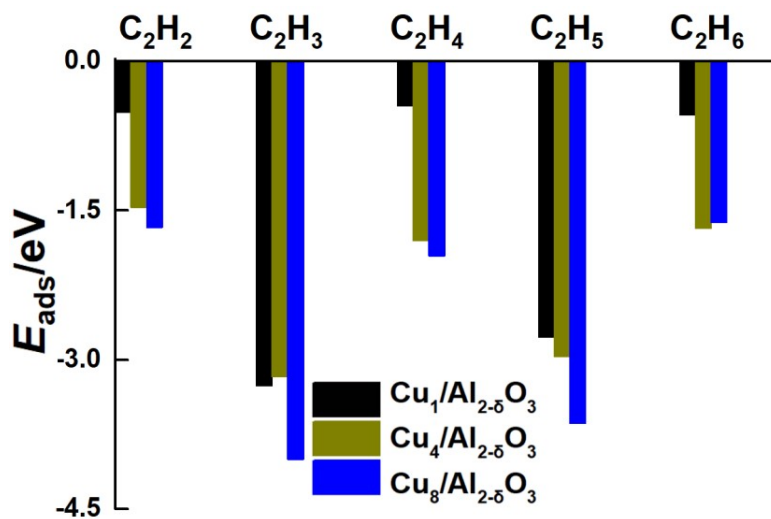

Figure S 10 The adsorption energies of the intermediates on the clean and H pre-covered  $\text{Cu}_n/\text{Al}_{2-\delta}\text{O}_3$  ( $n=1, 4, 8$ ).

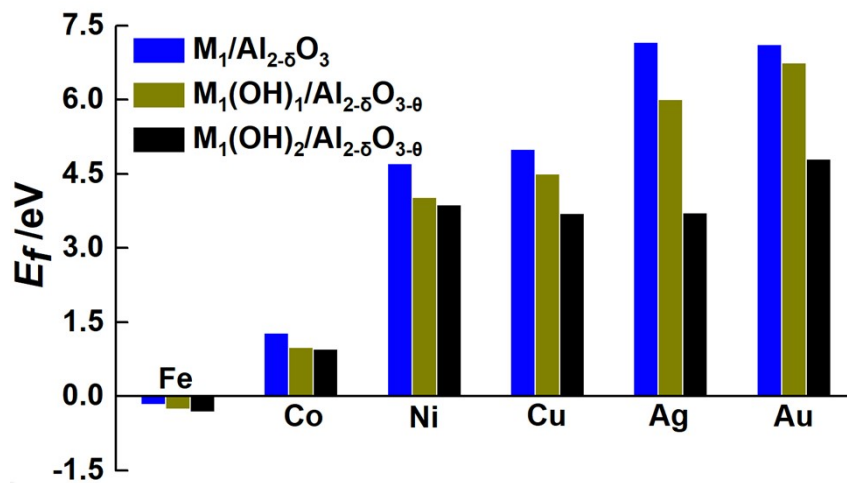

Figure S 11 The formation energy ( $E_f$ ) of  $M_1/Al_{2-\delta}O_3$  and  $M_1(OH)_n/Al_{2-\delta}O_{3-\theta}$  ( $n=1, 2$ ).

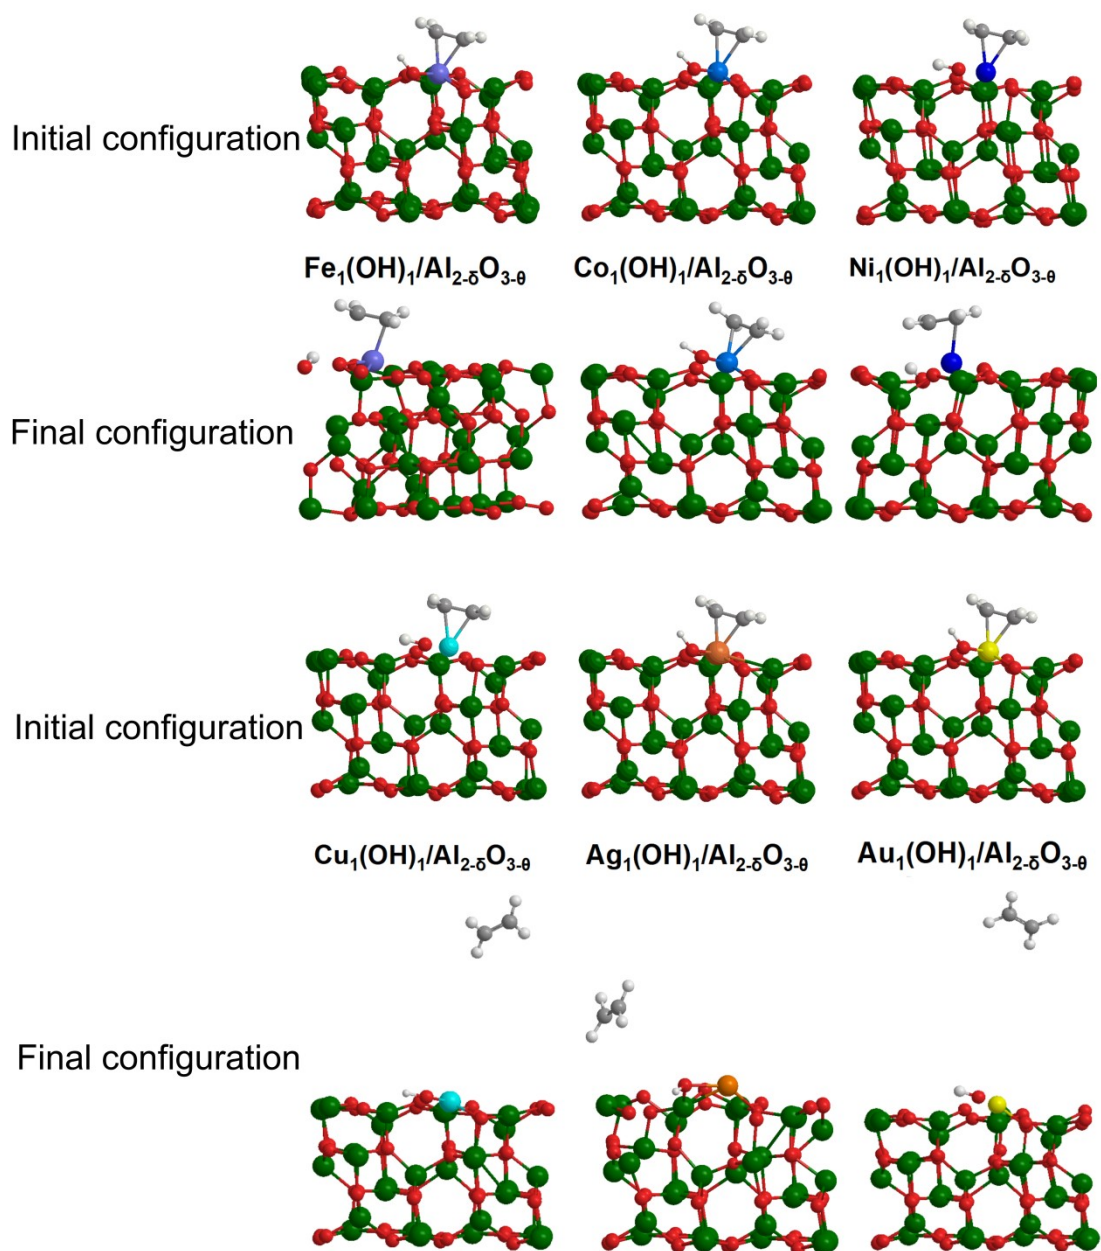

Figure S 12 The configuration of  $\text{C}_2\text{H}_4$  on the  $\text{M}_1(\text{OH})_1/\text{Al}_{2.5}\text{O}_3$  ( $\text{M}=\text{Fe}, \text{Co}, \text{Ni}, \text{Cu}, \text{Ag}, \text{Au}$ ) after 15 ps AIMD simulation at 463.15K.

# Fe<sub>1</sub>/Al<sub>2-δ</sub>O<sub>3</sub>

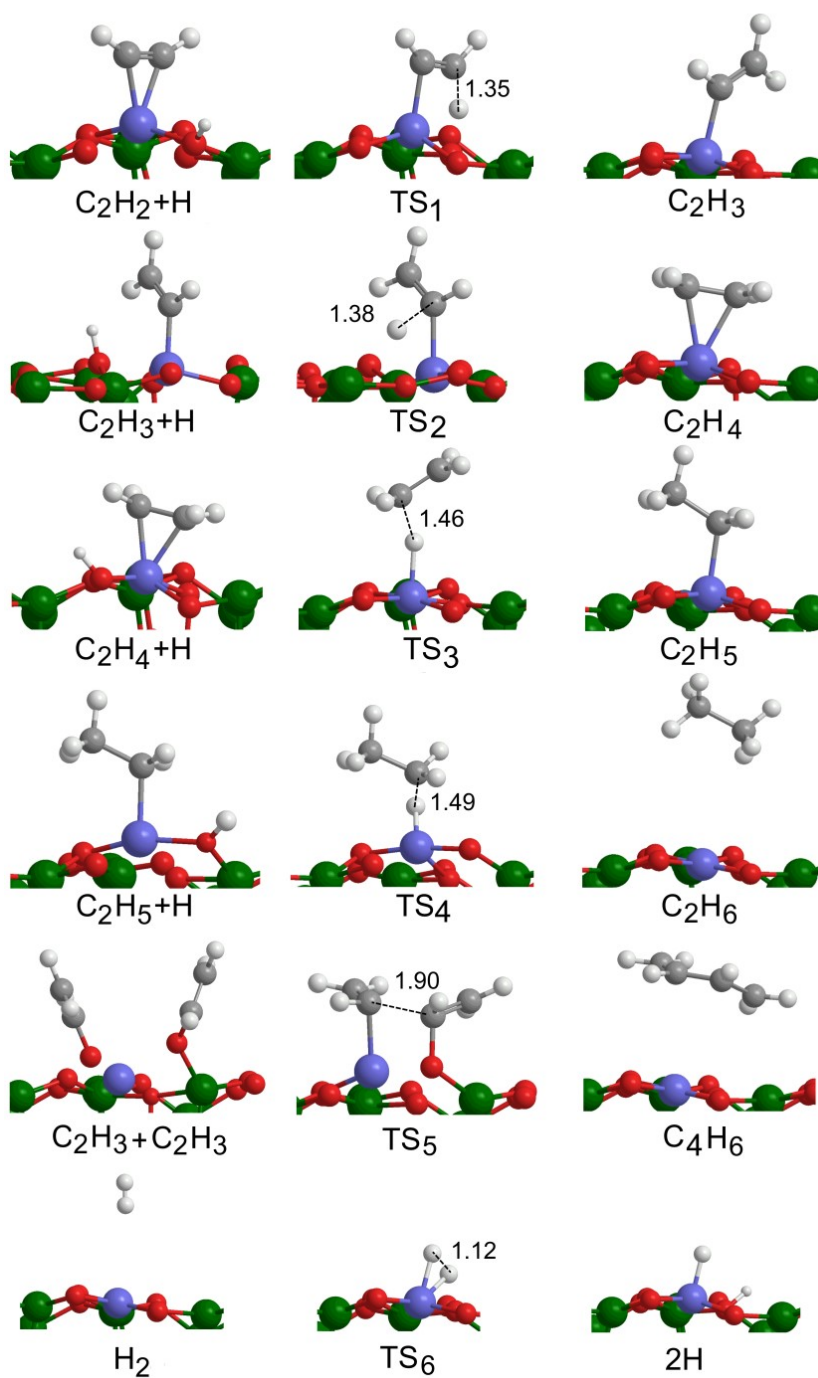

Figure S 13 The structures of possible TSs on the Fe<sub>1</sub>/Al<sub>2-δ</sub>O<sub>3</sub>.

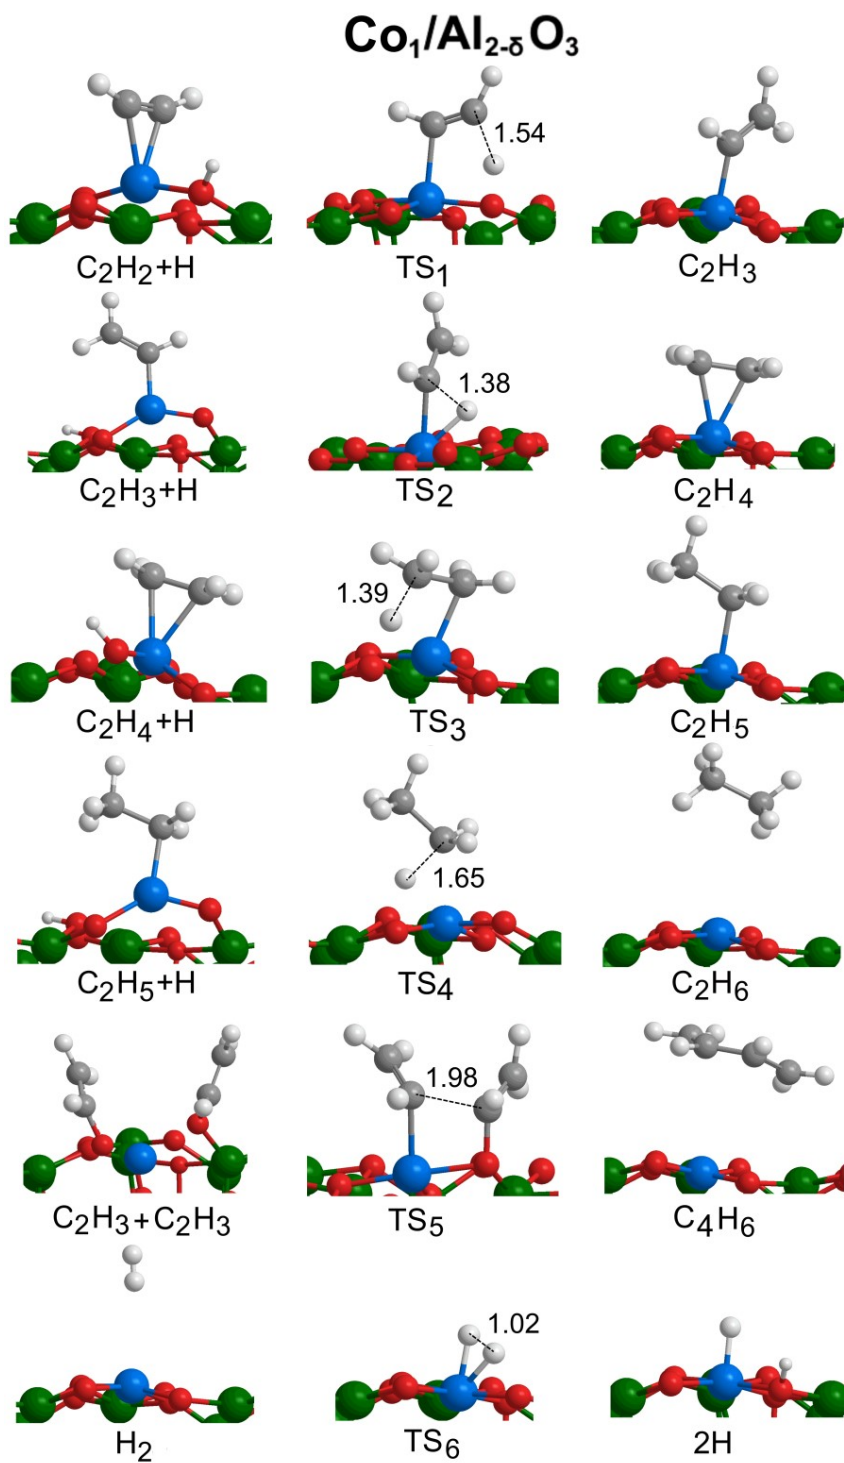

Figure S 14 The structures of possible TSs on the Co<sub>1</sub>/Al<sub>2.5</sub>O<sub>3</sub>.

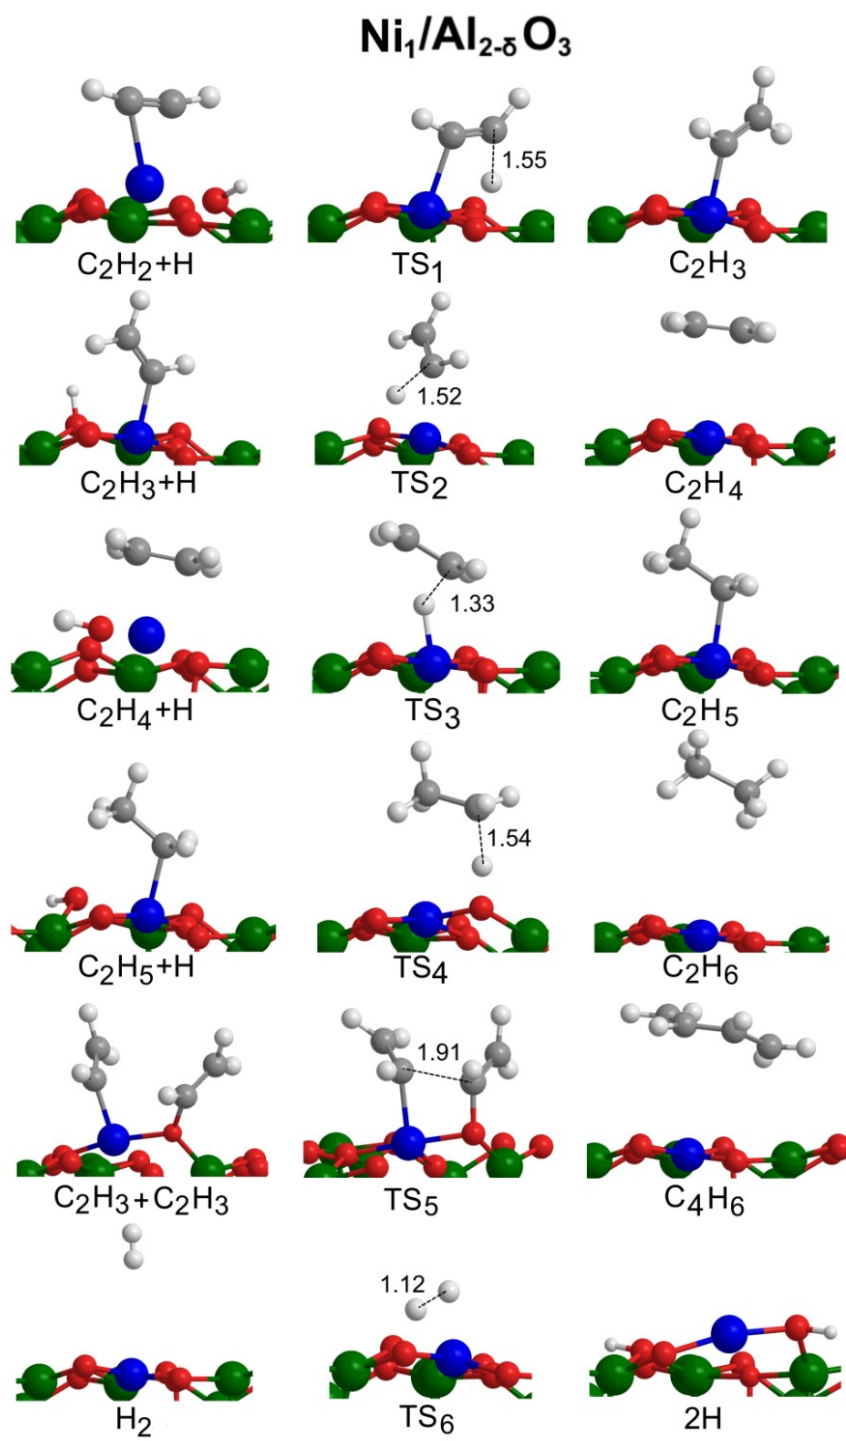

Figure S 15 The structures of possible TSs on the Ni<sub>1</sub>/Al<sub>2-δ</sub>O<sub>3</sub>.



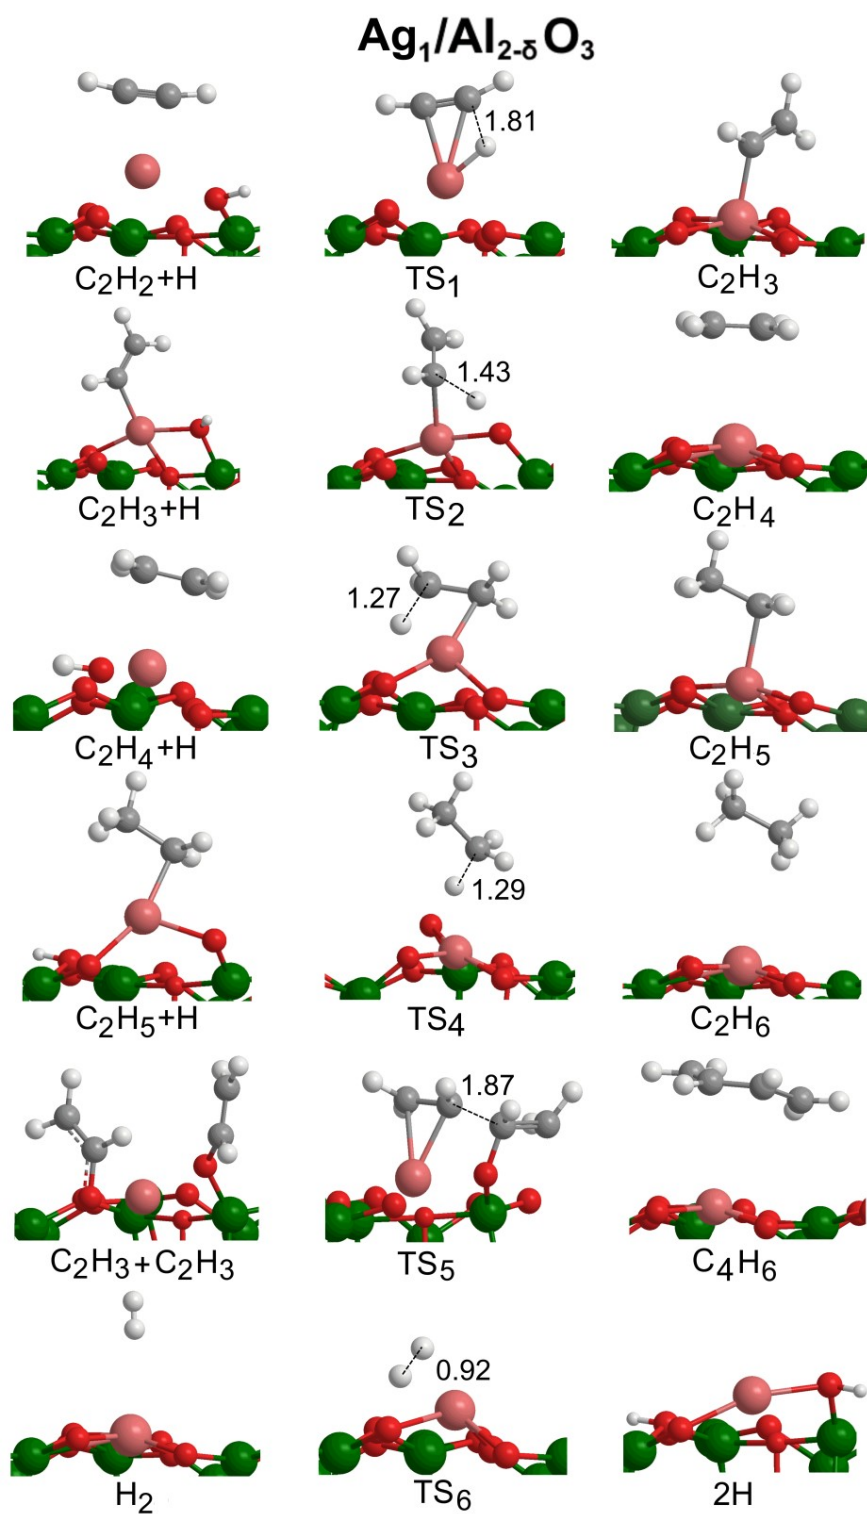

Figure S 16 The structures of possible TSs on the Ag<sub>1</sub>/Al<sub>2-δ</sub>O<sub>3</sub>.

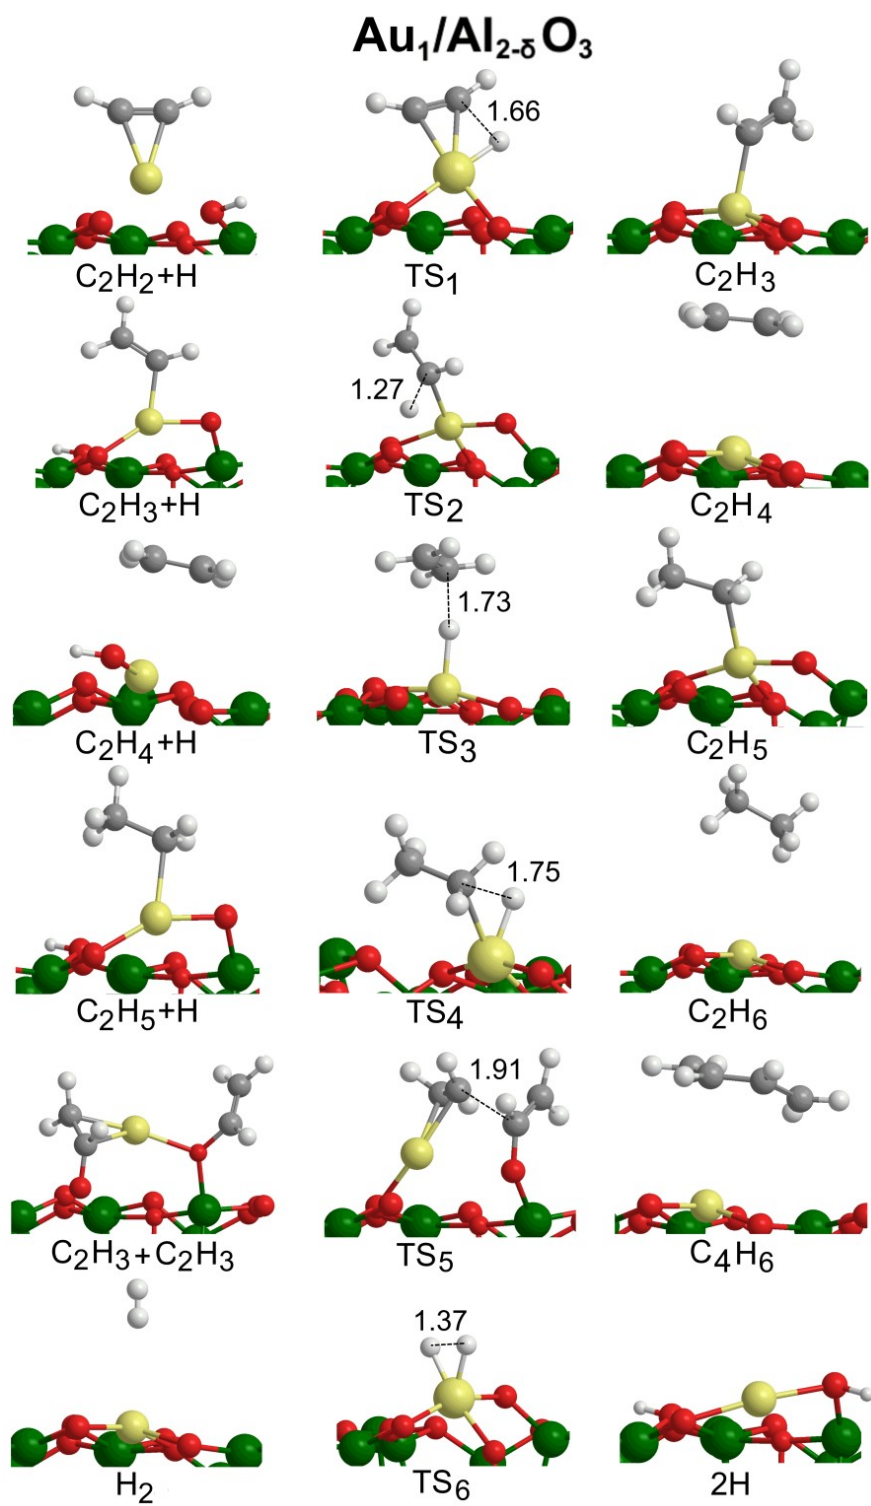

Figure S 17 The structures of possible TSs on the Au<sub>1</sub>/Al<sub>2-δ</sub>O<sub>3</sub>.

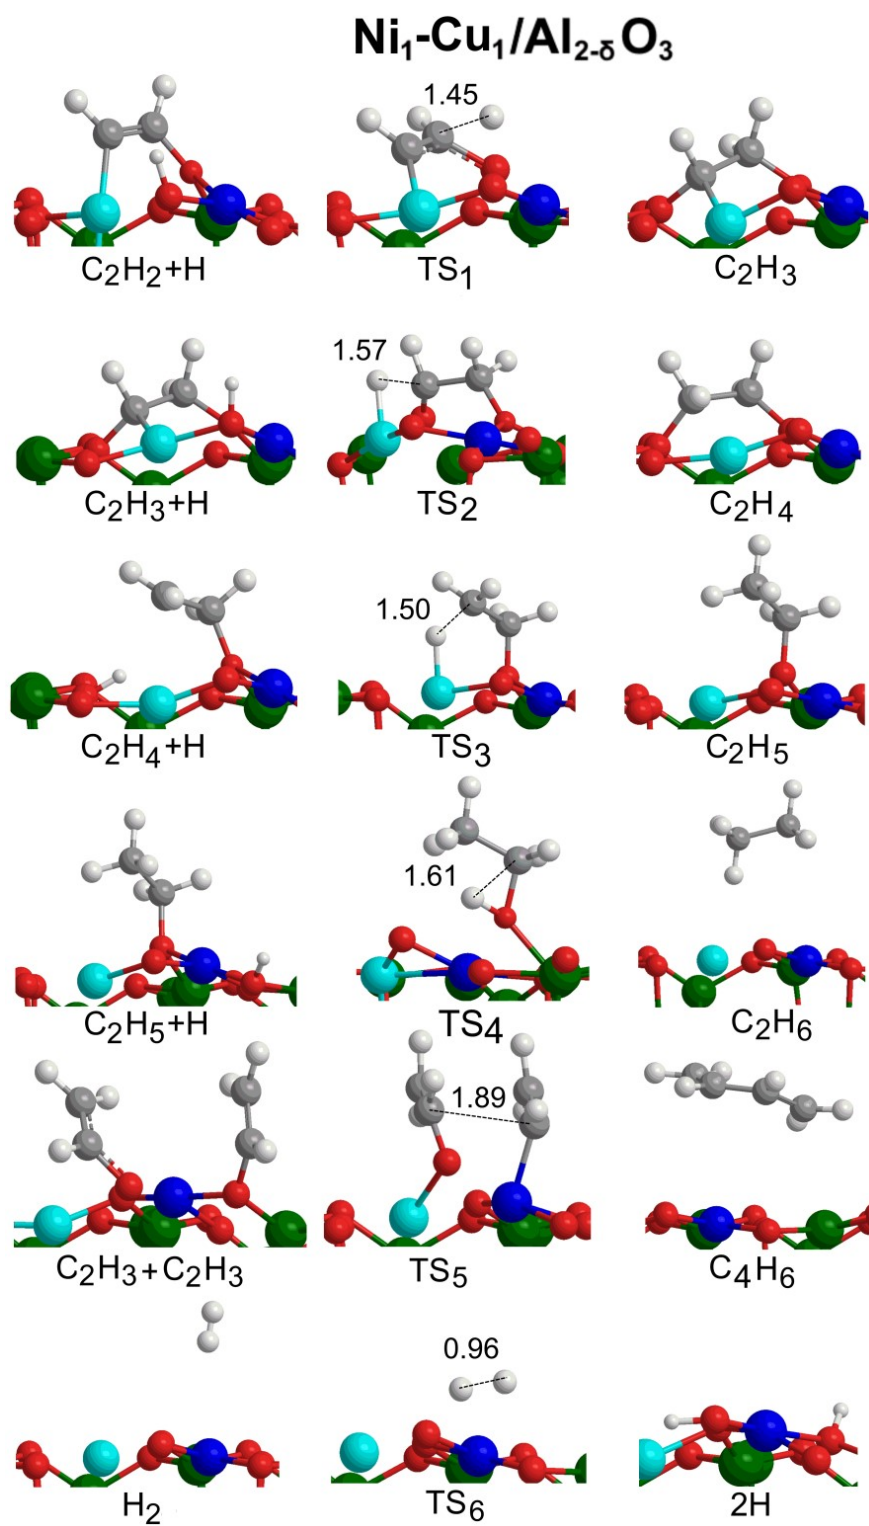

Figure S 18 The structures of possible TSs on the Ni<sub>1</sub>-Cu<sub>1</sub>/Al<sub>2-δ</sub>O<sub>3</sub>.

Table S 1 The adsorption energies (eV) of the intermediates on the  $M_1/Al_{2-\delta}O_3$  (M=Fe, Co, Ni, Cu, Ag, Au).

|                     |          | $C_2H_2$ | $C_2H_3$ | $C_2H_4$ | $C_2H_5$ | $C_2H_6$ | 1,3- $C_4H_6$ |
|---------------------|----------|----------|----------|----------|----------|----------|---------------|
| $Fe_1/Al_2O_3(100)$ | PBE      | -0.13    | -2.39    | -0.39    | -2.00    | -0.01    | -0.39         |
|                     | rPBE-vdW | -0.60    | -2.60    | -1.03    | -2.14    | -0.37    | -1.05         |
| $Co_1/Al_2O_3(100)$ | PBE      | -0.08    | -2.36    | -0.30    | -1.99    | 0.04     | -0.37         |
|                     | rPBE-vdW | -0.63    | -2.65    | -0.97    | -2.18    | -0.60    | -1.00         |
| $Ni_1/Al_2O_3(100)$ | PBE      | -0.10    | -2.47    | -0.31    | -2.15    | -0.03    | -0.31         |
|                     | rPBE-vdW | -0.58    | -2.77    | -0.94    | -2.36    | -0.63    | -0.98         |
| $Cu_1/Al_2O_3(100)$ | PBE      | -0.07    | -2.39    | -0.03    | -1.95    | -0.02    | -0.22         |
|                     | rPBE-vdW | -0.51    | -2.67    | -0.45    | -2.01    | -0.54    | -0.94         |
| $Ag_1/Al_2O_3(100)$ | PBE      | -0.11    | -0.87    | -0.07    | -0.74    | -0.01    | -0.29         |
|                     | rPBE-vdW | -0.48    | -1.10    | -0.46    | -0.91    | -0.53    | -0.82         |
| $Au_1/Al_2O_3(100)$ | PBE      | -0.04    | -1.03    | -0.01    | -0.89    | -0.02    | -0.26         |
|                     | rPBE-vdW | -0.47    | -1.31    | -0.32    | -1.00    | -0.38    | -0.84         |

Table S 2 The parameter of the pathways on the Cu<sub>1</sub>/Al<sub>2-δ</sub>O<sub>3</sub> in the microkinetic modeling.

| Elementary step                                                                                                             | /eV                    |                        | /s <sup>-1</sup>     |                      |
|-----------------------------------------------------------------------------------------------------------------------------|------------------------|------------------------|----------------------|----------------------|
|                                                                                                                             | <i>E<sub>a,+</sub></i> | <i>E<sub>a,-</sub></i> | <i>A<sub>+</sub></i> | <i>A<sub>-</sub></i> |
| H <sub>2(g)</sub> +2* <sup>*</sup> =2H* <sup>*</sup>                                                                        | <i>E<sub>a,+</sub></i> | 0.80                   | <i>A<sub>+</sub></i> | 4.2×10 <sup>11</sup> |
|                                                                                                                             | <i>E<sub>a,-</sub></i> | 3.00                   | <i>A<sub>-</sub></i> | 2.1×10 <sup>13</sup> |
| C <sub>2</sub> H <sub>2(g)</sub> +* <sup>*</sup> =C <sub>2</sub> H <sub>2</sub> * <sup>*</sup>                              | <i>E<sub>a,+</sub></i> | 0.00                   | <i>A<sub>+</sub></i> | 6.7×10 <sup>7</sup>  |
|                                                                                                                             | <i>E<sub>a,-</sub></i> | 0.51                   | <i>A<sub>-</sub></i> | 4.9×10 <sup>17</sup> |
| C <sub>2</sub> H <sub>2</sub> * <sup>*</sup> +H* <sup>*</sup> =C <sub>2</sub> H <sub>3</sub> * <sup>*</sup> +* <sup>*</sup> | <i>E<sub>a,+</sub></i> | 0.76                   | <i>A<sub>+</sub></i> | 1.4×10 <sup>13</sup> |
|                                                                                                                             | <i>E<sub>a,-</sub></i> | 1.24                   | <i>A<sub>-</sub></i> | 1.6×10 <sup>13</sup> |
| C <sub>2</sub> H <sub>3</sub> * <sup>*</sup> +H* <sup>*</sup> =C <sub>2</sub> H <sub>4</sub> * <sup>*</sup> +* <sup>*</sup> | <i>E<sub>a,+</sub></i> | 1.43                   | <i>A<sub>+</sub></i> | 1.4×10 <sup>13</sup> |
|                                                                                                                             | <i>E<sub>a,-</sub></i> | 0.62                   | <i>A<sub>-</sub></i> | 1.5×10 <sup>13</sup> |
| C <sub>2</sub> H <sub>4</sub> * <sup>*</sup> +H* <sup>*</sup> =C <sub>2</sub> H <sub>5</sub> * <sup>*</sup> +* <sup>*</sup> | <i>E<sub>a,+</sub></i> | 1.57                   | <i>A<sub>+</sub></i> | 1.5×10 <sup>13</sup> |
|                                                                                                                             | <i>E<sub>a,-</sub></i> | 2.93                   | <i>A<sub>-</sub></i> | 1.8×10 <sup>13</sup> |
| C <sub>2</sub> H <sub>5</sub> * <sup>*</sup> +H* <sup>*</sup> =C <sub>2</sub> H <sub>6(g)</sub> +2* <sup>*</sup>            | <i>E<sub>a,+</sub></i> | 1.59                   | <i>A<sub>+</sub></i> | 1.4×10 <sup>13</sup> |
|                                                                                                                             | <i>E<sub>a,-</sub></i> | 1.75                   | <i>A<sub>-</sub></i> | 1.7×10 <sup>13</sup> |
| 2C <sub>2</sub> H <sub>3</sub> * <sup>*</sup> =C <sub>4</sub> H <sub>6</sub> * <sup>*</sup> +* <sup>*</sup>                 | <i>E<sub>a,+</sub></i> | 1.70                   | <i>A<sub>+</sub></i> | 1.6×10 <sup>13</sup> |
|                                                                                                                             | <i>E<sub>a,-</sub></i> | 2.30                   | <i>A<sub>-</sub></i> | 1.6×10 <sup>13</sup> |
| C <sub>4</sub> H <sub>6</sub> * <sup>*</sup> =C <sub>4</sub> H <sub>6(g)</sub> +* <sup>*</sup>                              | <i>E<sub>a,+</sub></i> | 0.89                   | <i>A<sub>+</sub></i> | 1.0×10 <sup>18</sup> |
|                                                                                                                             | <i>E<sub>a,-</sub></i> | 0.00                   | <i>A<sub>-</sub></i> | 4.7×10 <sup>7</sup>  |
| C <sub>2</sub> H <sub>4</sub> * <sup>*</sup> =C <sub>2</sub> H <sub>4(g)</sub> +* <sup>*</sup>                              | <i>E<sub>a,+</sub></i> | 0.45                   | <i>A<sub>+</sub></i> | 5.4×10 <sup>17</sup> |
|                                                                                                                             | <i>E<sub>a,-</sub></i> | 0.00                   | <i>A<sub>-</sub></i> | 6.5×10 <sup>7</sup>  |

Table S 3 The adsorption energies of possible intermediates (eV).

| Surface                                           | C <sub>2</sub> H <sub>2</sub> | C <sub>2</sub> H <sub>3</sub> | C <sub>2</sub> H <sub>4</sub> | C <sub>2</sub> H <sub>5</sub> | C <sub>2</sub> H <sub>6</sub> | 1,3-C <sub>4</sub> H <sub>6</sub> | Surface                                                               | C <sub>2</sub> H <sub>2</sub> | C <sub>2</sub> H <sub>4</sub> |
|---------------------------------------------------|-------------------------------|-------------------------------|-------------------------------|-------------------------------|-------------------------------|-----------------------------------|-----------------------------------------------------------------------|-------------------------------|-------------------------------|
| Fe <sub>1</sub> /Al <sub>2-δ</sub> O <sub>3</sub> | -0.60                         | -2.92                         | -0.70                         | -2.56                         | -0.92                         | -0.90                             | Fe <sub>1</sub> (OH) <sub>1</sub> /Al <sub>2-δ</sub> O <sub>3-θ</sub> | -1.55                         | -1.23                         |
| Co <sub>1</sub> /Al <sub>2-δ</sub> O <sub>3</sub> | -0.64                         | -2.93                         | -0.66                         | -2.54                         | -0.44                         | -1.00                             | Co <sub>1</sub> (OH) <sub>1</sub> /Al <sub>2-δ</sub> O <sub>3-θ</sub> | -1.16                         | -1.19                         |
| Ni <sub>1</sub> /Al <sub>2-δ</sub> O <sub>3</sub> | -0.58                         | -3.03                         | -0.65                         | -2.70                         | -0.59                         | -1.02                             | Ni <sub>1</sub> (OH) <sub>1</sub> /Al <sub>2-δ</sub> O <sub>3-θ</sub> | -0.71                         | -0.90                         |
| Ag <sub>1</sub> /Al <sub>2-δ</sub> O <sub>3</sub> | -0.47                         | -1.27                         | -0.46                         | -1.21                         | -0.57                         | -0.92                             | Ag <sub>1</sub> (OH) <sub>1</sub> /Al <sub>2-δ</sub> O <sub>3-θ</sub> | -1.79                         | -0.59                         |
| Au <sub>1</sub> /Al <sub>2-δ</sub> O <sub>3</sub> | -0.10                         | -1.40                         | -0.32                         | -1.44                         | -0.46                         | -0.83                             | Au <sub>1</sub> (OH) <sub>1</sub> /Al <sub>2-δ</sub> O <sub>3-θ</sub> | -0.98                         | -0.79                         |
